# The American Journal of Psychiatry

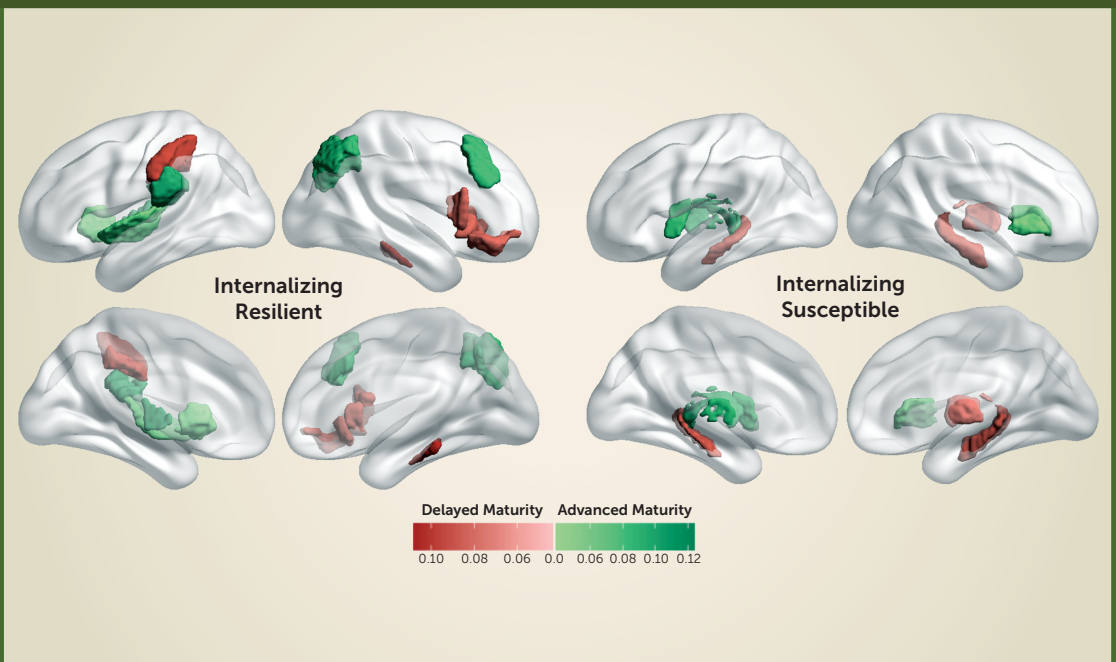

Differential Patterns of Delayed Emotion Circuit Maturation in Abused Girls With and Without Internalizing Psychopathology

Early Adversity and Development: Parsing Heterogeneity and Identifying Pathways of Risk and Resilience

Brain-Based Biotypes of Psychiatric Vulnerability in the Acute Aftermath of Trauma

Predictors of Suicide Attempt Within 30 Days After First Medically Documented Suicidal Ideation in U.S. Army Soldiers
